# Supplementary material
Source: ML conference proceedings conference paper supplement (https://proceedings.mlr.press/v97/cardoso19a.html)
Supplement: Supplementary file [file cardoso19a-supp.pdf]

## Supplementary material

### A. Omitted Proofs

*Proof of Theorem 1.* We assume there exists an algorithm such that  $|\sum_{t=1}^T x_t^\top A_t y_t - \min_{x \in X} \max_{y \in Y} \sum_{t=1}^T x^\top A_t y| \leq o(T)$ ,  $\sum_{t=1}^T x_t^\top A_t y_t - \min_{x \in \Delta_X} \sum_{t=1}^T x^\top A_t y_t \leq o(T)$ , and  $\max_{y \in \Delta_Y} \sum_{t=1}^T x_t^\top A_t y - \sum_{t=1}^T x_t^\top A_t y_t \leq o(T)$  for all possible sequences of matrices  $\{A_t\}_{t=1}^T$  with bounded entries between  $[-1, 1]$ . We now construct two sequences of functions for which all the three guarantees hold and lead that to a contradiction. Let  $T$  be divisible by 2. In scenario 1:  $A_t = \begin{bmatrix} 1 & -1 \\ -1 & 1 \end{bmatrix}$  for  $1 \leq t \leq \frac{T}{2}$  and  $A_t = \begin{bmatrix} 0 & 0 \\ 0 & 0 \end{bmatrix}$  for  $\frac{T}{2} < t \leq T$ . In scenario 2:  $A_t = \begin{bmatrix} 1 & -1 \\ -1 & 1 \end{bmatrix}$  for  $1 \leq t \leq \frac{T}{2}$  and  $A_t = \begin{bmatrix} 1 & -1 \\ 1 & -1 \end{bmatrix}$  for  $\frac{T}{2} < t \leq T$ . It is easy to see that for both scenarios it holds that  $\min_{x \in X} \max_{y \in Y} \sum_{t=1}^T x^\top A_t y = 0$ . Since  $d_1 = d_2 = 2$  and we can parametrize any  $x \in \Delta_X$  as  $x = [\alpha; 1 - \alpha]$  and any  $y \in \Delta_Y$  as  $y = [\beta; 1 - \beta]$  for some  $0 \leq \alpha, \beta \leq 1$ . By assumption we have that  $\max_{y \in \Delta_Y} \sum_{t=1}^T x_t^\top A_t y - \min_{x \in X} \max_{y \in Y} \sum_{t=1}^T x^\top A_t y \leq o(T)$  for all sequences of matrices  $\{A_t\}_{t=1}^T$ . This implies for scenario 1 that  $\max_{0 \leq \beta \leq 1} \sum_{t=1}^{\frac{T}{2}} 4\alpha_t \beta - 2\beta + 1 - 2\alpha_t \leq o(T)$  which also implies that  $\sum_{t=1}^{\frac{T}{2}} 2\alpha_t - 1 \leq o(T)$  and  $\sum_{t=1}^{\frac{T}{2}} 1 - 2\alpha_t \leq o(T)$  since  $\sum_{t=1}^{\frac{T}{2}} 4\alpha_t \beta - 2\beta + 1 - 2\alpha_t$  is a linear function of  $\beta$  and thus its maximum occurs at  $\beta = 0$  or  $\beta = 1$ .

For scenario 2  $\max_{y \in \Delta_Y} \sum_{t=1}^T x_t^\top A_t y - \min_{x \in X} \max_{y \in Y} \sum_{t=1}^T x^\top A_t y \leq o(T)$  reduces to  $\max_{0 \leq \beta \leq 1} \sum_{t=1}^{\frac{T}{2}} 4\alpha_t \beta - 2\beta + 1 - 2\alpha_t + \frac{T}{2}(2\beta - 1) \leq o(T)$  which implies  $\sum_{t=1}^{\frac{T}{2}} 2\alpha_t - 1 + \frac{T}{2} \leq o(T)$  and  $\sum_{t=1}^{\frac{T}{2}} 1 - 2\alpha_t + \frac{T}{2} \leq o(T)$ . Finally, notice that  $\sum_{t=1}^{\frac{T}{2}} 2\alpha_t - 1 + \frac{T}{2} \leq o(T)$  implies  $\frac{T}{2} \leq o(T) + \sum_{t=1}^{\frac{T}{2}} 1 - 2\alpha_t$  but from scenario 1 we have that  $\sum_{t=1}^{\frac{T}{2}} 1 - 2\alpha_t \leq o(T)$  since  $\frac{T}{2} \leq o(T)$  is a contradiction we get the result.  $\square$

*Proof of Lemma 1.* We omit the subscript  $t$ .

$$\begin{aligned}
 \|\nabla x^\top A y\|_2 &= \left\| \begin{bmatrix} \nabla_x x^\top A y \\ \nabla_y x^\top A y \end{bmatrix} \right\|_2 \\
 &= \left\| \begin{bmatrix} A_{[1, \cdot]}^\top y \\ \dots \\ A_{[d_1, \cdot]}^\top y \\ A_{[\cdot, 1]}^\top x \\ \dots \\ A_{[\cdot, d_2]}^\top x \end{bmatrix} \right\|_2 \\
 &\leq \left\| \begin{bmatrix} A_{[1, \cdot]}^\top y \\ \dots \\ A_{[d_1, \cdot]}^\top y \end{bmatrix} \right\|_2 + \left\| \begin{bmatrix} A_{[\cdot, 1]}^\top x \\ \dots \\ A_{[\cdot, d_2]}^\top x \end{bmatrix} \right\|_2 \\
 &\leq \sqrt{\sum_{i=1}^{d_1} (A_{[i, \cdot]}^\top y)^2} + \left\| \begin{bmatrix} A_{[\cdot, 1]}^\top x \\ \dots \\ A_{[\cdot, d_2]}^\top x \end{bmatrix} \right\|_2 \\
 &\leq \sqrt{d_1 (\|A_{[i, \cdot]}\|_\infty \|y\|_1)^2} + \left\| \begin{bmatrix} A_{[\cdot, 1]}^\top x \\ \dots \\ A_{[\cdot, d_2]}^\top x \end{bmatrix} \right\|_2 \quad \text{by Generalized Cauchy Schwartz} \\
 &\leq \sqrt{cd_1} + \left\| \begin{bmatrix} A_{[\cdot, 1]}^\top x \\ \dots \\ A_{[\cdot, d_2]}^\top x \end{bmatrix} \right\|_2 \\
 &\leq \sqrt{cd_1} + \sqrt{cd_2}. \quad (\text{using the same reasoning})
 \end{aligned}$$

The second part of the claim follows by bounding  $\|\nabla x^\top A y\|_\infty$  using the same argument.  $\square$

*Proof of Lemma 2.*

$$\begin{aligned}
 \min_{x \in X} \max_{y \in Y} \sum_{t=1}^T \mathcal{L}_t(x, y) &= \sum_{t=1}^T [\bar{\mathcal{L}}_t(x_{T+1}, y_{T+1}) + \frac{1}{\eta} R_X(x_{T+1}) - \frac{1}{\eta} R_Y(y_{T+1})] \\
 &\leq \sum_{t=1}^T [\bar{\mathcal{L}}_t(\bar{x}_{T+1}, y_{T+1}) + \frac{1}{\eta} R_X(\bar{x}_{T+1}) - \frac{1}{\eta} R_Y(y_{T+1})] && \text{by Equation (2)} \\
 &\leq \sum_{t=1}^T [\bar{\mathcal{L}}_t(\bar{x}_{T+1}, \bar{y}_{T+1}) + \frac{1}{\eta} R_X(\bar{x}_{T+1}) - \frac{1}{\eta} R_Y(y_{T+1})] && \text{by Equation (2)} \\
 &= \min_{x \in X} \max_{y \in Y} \sum_{t=1}^T [\bar{\mathcal{L}}_t(x, y) + \frac{T}{\eta} R_X(\bar{x}_{T+1}) - \frac{T}{\eta} R_Y(y_{T+1})] \\
 &\leq \min_{x \in X} \max_{y \in Y} \sum_{t=1}^T \bar{\mathcal{L}}_t(x, y) + \frac{T}{\eta} R_X(\bar{x}_{T+1}).
 \end{aligned}$$

The other inequality can be obtained by a similar argument.  $\square$

*Proof of Lemma 3.* We first prove the second inequality. We proceed by induction. The base case  $t = 1$  holds by definition of  $(x_2, y_2)$ , indeed

$$\mathcal{L}_1(x_2, y_2) + G_{\mathcal{L}} \|y_1 - y_2\| \geq \mathcal{L}_1(x_2, y_2) := \min_{x \in X} \max_{y \in Y} \mathcal{L}_1(x, y).$$

We now assume the following claim holds for  $T - 1$ :

$$\min_{x \in X} \max_{y \in Y} \sum_{t=1}^{T-1} \mathcal{L}_t(x, y) \geq \sum_{t=1}^{T-1} \mathcal{L}_t(x_{t+1}, y_{t+1}) - G_{\mathcal{L}} \sum_{t=1}^{T-1} \|y_t - y_{t+1}\|, \quad (8)$$

and show it holds for  $T$ .

$$\begin{aligned}
 &\min_{x \in X} \max_{y \in Y} \sum_{t=1}^T \mathcal{L}_t(x, y) \\
 &= \sum_{t=1}^{T-1} \mathcal{L}_t(x_{T+1}, y_{T+1}) + \mathcal{L}_T(x_{T+1}, y_{T+1}) \\
 &\geq \sum_{t=1}^{T-1} \mathcal{L}_t(x_{T+1}, y_T) + \mathcal{L}_T(x_{T+1}, y_T) && \text{by Equation (2)} \\
 &\geq \sum_{t=1}^{T-1} \mathcal{L}_t(x_T, y_T) + \mathcal{L}_T(x_{T+1}, y_T) && \text{by Equation (2)} \\
 &\geq \sum_{t=1}^{T-1} \mathcal{L}_t(x_{t+1}, y_{t+1}) - G_{\mathcal{L}} \sum_{t=1}^{T-1} \|y_t - y_{t+1}\| + \mathcal{L}_T(x_{T+1}, y_T) && \text{by Equation (8)} \\
 &= \sum_{t=1}^T \mathcal{L}_t(x_{t+1}, y_{t+1}) - G_{\mathcal{L}} \sum_{t=1}^{T-1} \|y_t - y_{t+1}\| + \mathcal{L}_T(x_{T+1}, y_T) - \mathcal{L}_T(x_{T+1}, y_{T+1}) \\
 &\geq \sum_{t=1}^T \mathcal{L}_t(x_{t+1}, y_{t+1}) - G_{\mathcal{L}} \sum_{t=1}^{T-1} \|y_t - y_{t+1}\| - G_{\mathcal{L}} \|y_T - y_{T+1}\| \\
 &= \sum_{t=1}^T \mathcal{L}_t(x_{t+1}, y_{t+1}) - G_{\mathcal{L}} \sum_{t=1}^T \|y_t - y_{t+1}\|.
 \end{aligned}$$

We now show by induction that

$$\min_{x \in X} \max_{y \in Y} \sum_{t=1}^T \mathcal{L}_t(x, y) \leq \sum_{t=1}^T \mathcal{L}_t(x_{t+1}, y_{t+1}) + G_{\mathcal{L}} \sum_{t=1}^T \|x_t - x_{t+1}\|.$$

Indeed,  $t = 1$  follows from the definition of  $(x_2, y_2)$ . We now assume the claim holds for  $T - 1$  and prove it for  $T$ :

$$\begin{aligned} & \min_{x \in X} \max_{y \in Y} \sum_{t=1}^T \mathcal{L}_t(x, y) \\ &= \sum_{t=1}^T \mathcal{L}_t(x_{T+1}, y_{T+1}) \\ &\leq \sum_{t=1}^{T-1} \mathcal{L}_t(x_T, y_{T+1}) + \mathcal{L}_T(x_T, y_{T+1}) && \text{by Equation (2)} \\ &\leq \sum_{t=1}^{T-1} \mathcal{L}_t(x_T, y_T) + \mathcal{L}_T(x_T, y_{T+1}) && \text{by Equation (2)} \\ &\leq \sum_{t=1}^{T-1} \mathcal{L}_t(x_{t+1}, y_{t+1}) + G_{\mathcal{L}} \sum_{t=1}^{T-1} \|x_t - x_{t+1}\| \\ &\quad + \mathcal{L}_T(x_T, y_{T+1}) + \mathcal{L}_T(x_{T+1}, y_{T+1}) - \mathcal{L}_T(x_{T+1}, y_{T+1}) && \text{by induction claim} \\ &\leq \sum_{t=1}^T \mathcal{L}_t(x_{t+1}, y_{t+1}) + G_{\mathcal{L}} \sum_{t=1}^T \|x_t - x_{t+1}\| && \text{since } \mathcal{L}_T \text{ is } G_{\mathcal{L}}\text{-Lipschitz.} \end{aligned}$$

□

*Proof of Lemma 3.* Fix  $t$ , define  $J(x, y) \triangleq \sum_{\tau=1}^{t-1} \mathcal{L}_\tau(x, y) + \mathcal{L}_t(x, y)$  and notice it is  $\frac{t}{\eta}$ -strongly convex strongly concave with respect to norm  $\|\cdot\|$ . Also notice that  $(x_{t+1}, y_{t+1})$  is the unique saddle point of  $J(x, y)$ .

By strong convexity of  $J$  and definition of  $x_{t+1}$  it holds that for any  $x \in X$  and any  $y \in Y$

$$J(x, y) \geq J(x_{t+1}, y) + \nabla_x J(x_{t+1}, y)^\top (x - x_{t+1}) + \frac{t}{2\eta} \|x - x_{t+1}\|^2.$$

Plugging in  $y = y_{t+1}$  and recalling the KKT condition  $\nabla_x J(x_{t+1}, y_{t+1})^\top (x - x_{t+1}) \geq 0$ , we have that for any  $x \in X$

$$\frac{2\eta}{t} [J(x, y_{t+1}) - J(x_{t+1}, y_{t+1})] \geq \|x - x_{t+1}\|^2. \quad (9)$$

Similarly, since  $J$  is  $\frac{t}{\eta}$  strongly concave. That is, for any  $y \in Y$

$$J(x_{t+1}, y) \leq J(x_{t+1}, y_{t+1}) + \nabla_y J(x_{t+1}, y_{t+1})^\top (y - y_{t+1}) - \frac{t}{2\eta} \|y - y_{t+1}\|^2.$$

Together with the KKT condition  $\nabla_y J(x_{t+1}, y_{t+1})^\top (y - y_{t+1}) \leq 0$  we get that for any  $y \in Y$

$$\frac{2\eta}{t} [J(x_{t+1}, y_{t+1}) - J(x_{t+1}, y)] \geq \|y - y_{t+1}\|^2. \quad (10)$$

Adding up Equations (9) and (10), plugging  $x = x_t$  and  $y = y_t$  we get

$$\begin{aligned} & \frac{2\eta}{t} [J(x_t, y_{t+1}) - J(x_{t+1}, y_t)] \geq \|x_t - x_{t+1}\|^2 + \|y - y_{t+1}\|^2. \\ \iff & \frac{2\eta}{t} \left[ \sum_{\tau=1}^{t-1} \mathcal{L}_\tau(x_t, y_{t+1}) + \mathcal{L}_t(x_t, y_{t+1}) - \left[ \sum_{\tau=1}^{t-1} \mathcal{L}_\tau(x_{t+1}, y_t) + \mathcal{L}_t(x_{t+1}, y_t) \right] \right] \end{aligned}$$

$$\begin{aligned}
 &\geq \|x_t - x_{t+1}\|^2 + \|y - y_{t+1}\|^2 \\
 \implies &\frac{2\eta}{t} \left[ \sum_{\tau=1}^{t-1} \mathcal{L}_\tau(x_t, y_t) + \mathcal{L}_t(x_t, y_{t+1}) - \left[ \sum_{\tau=1}^{t-1} \mathcal{L}_\tau(x_{t+1}, y_t) + \mathcal{L}_t(x_{t+1}, y_t) \right] \right] \\
 &\geq \|x_t - x_{t+1}\|^2 + \|y - y_{t+1}\|^2,
 \end{aligned}$$

since  $\sum_{\tau=1}^{t-1} \mathcal{L}_\tau(x_t, y_{t+1}) \leq \sum_{\tau=1}^{t-1} \mathcal{L}_\tau(x_t, y_t)$ .

Additionally, since  $\sum_{\tau=1}^{t-1} \mathcal{L}_\tau(x_t, y_t) \leq \sum_{\tau=1}^{t-1} \mathcal{L}_\tau(x_{t+1}, y_t)$ , we have

$$\begin{aligned}
 &\frac{2\eta}{t} \left[ \sum_{\tau=1}^{t-1} \mathcal{L}_\tau(x_t, y_t) + \mathcal{L}_t(x_t, y_{t+1}) - \sum_{\tau=1}^{t-1} \mathcal{L}_\tau(x_t, y_t) - \mathcal{L}_t(x_{t+1}, y_t) \right] \\
 &\geq \|x_t - x_{t+1}\|^2 + \|y - y_{t+1}\|^2 \\
 \iff &\frac{2\eta}{t} [\mathcal{L}_t(x_t, y_{t+1}) - \mathcal{L}_t(x_{t+1}, y_t)] \geq \|x_t - x_{t+1}\|^2 + \|y_t - y_{t+1}\|^2 \\
 \iff &\frac{2\eta}{t} \left[ \bar{\mathcal{L}}_t(x_t, y_{t+1}) + \frac{1}{\eta} R_X(x_t) - \frac{1}{\eta} R_Y(y_{t+1}) - \bar{\mathcal{L}}_t(x_{t+1}, y_t) - \frac{1}{\eta} R_X(x_{t+1}) + \frac{1}{\eta} R_Y(y_t) \right] \\
 &\geq \|x_t - x_{t+1}\|^2 + \|y_t - y_{t+1}\|^2 \\
 \implies &\frac{2\eta}{t} [G_{\bar{\mathcal{L}}} \| [x_t; y_{t+1}] - [x_{t+1}; y_t] \| + \frac{1}{\eta} R_X(x_t) - \frac{1}{\eta} R_X(x_{t+1}) + \frac{1}{\eta} R_Y(y_t) - \frac{1}{\eta} R_Y(y_{t+1})] \\
 &\geq \|x_t - x_{t+1}\|^2 + \|y_t - y_{t+1}\|^2 \\
 \implies &\frac{2\eta}{t} [G_{\bar{\mathcal{L}}} \|x_t - x_{t+1}\| + G_{\bar{\mathcal{L}}} \|y_t - y_{t+1}\| + \frac{1}{\eta} R_X(x_t) - \frac{1}{\eta} R_X(x_{t+1}) + \frac{1}{\eta} R_Y(y_t) - \frac{1}{\eta} R_Y(y_{t+1})] \\
 &\geq \|x_t - x_{t+1}\|^2 + \|y_t - y_{t+1}\|^2 \\
 \implies &\frac{2\eta}{t} [G_{\bar{\mathcal{L}}} \|x_t - x_{t+1}\| + G_{\bar{\mathcal{L}}} \|y_t - y_{t+1}\| + \frac{G_{R_X}}{\eta} \|x_t - x_{t+1}\| + \frac{G_{R_Y}}{\eta} \|y_t - y_{t+1}\|] \\
 &\geq \|x_t - x_{t+1}\|^2 + \|y_t - y_{t+1}\|^2 \\
 \implies &\frac{2\eta}{t} [G_{\bar{\mathcal{L}}} + \frac{1}{\eta} \max(G_{R_X}, G_{R_Y})] [\|x_t - x_{t+1}\| + \|y_t - y_{t+1}\|] \geq \|x_t - x_{t+1}\|^2 + \|y_t - y_{t+1}\|^2 \\
 \iff &\frac{2\eta}{t} [G_{\bar{\mathcal{L}}} + \frac{1}{\eta} \max(G_{R_X}, G_{R_Y})] \geq \frac{\|x_t - x_{t+1}\|^2 + \|y_t - y_{t+1}\|^2}{\|x_t - x_{t+1}\| + \|y_t - y_{t+1}\|}.
 \end{aligned}$$

Finally, since  $x^2$  is a convex function  $\frac{a^2}{2} + \frac{b^2}{2} \geq \left(\frac{a+b}{2}\right)^2$ , we have  $a^2 + b^2 \geq \frac{(a+b)^2}{2}$ . This, together with the last implication, yields the result

$$\frac{4\eta}{t} [G_{\bar{\mathcal{L}}} + \frac{1}{\eta} \max(G_{R_X}, G_{R_Y})] \geq \|x_t - x_{t+1}\| + \|y_t - y_{t+1}\|.$$

□

*Proof of Theorem 2.*

$$\begin{aligned}
 &\sum_{t=1}^T \bar{\mathcal{L}}_t(x_t, y_t) - \min_{x \in X} \max_{y \in Y} \sum_{t=1}^T \bar{\mathcal{L}}_t(x, y) \\
 &\leq \sum_{t=1}^T \mathcal{L}_t(x_t, y_t) - \min_{x \in X} \max_{y \in Y} \sum_{t=1}^T \bar{\mathcal{L}}_t(x, y) + \sum_{t=1}^T \frac{1}{\eta} R_Y(y_t) \quad \text{by Equation 6} \\
 &\leq \sum_{t=1}^T \mathcal{L}_t(x_t, y_t) - \min_{x \in X} \max_{y \in Y} \sum_{t=1}^T \mathcal{L}_t(x, y) + \sum_{t=1}^T \frac{1}{\eta} R_Y(y_t) + \frac{T}{\eta} R_X(x_{T+1}) \quad \text{by Lemma 2}
 \end{aligned}$$

$$\begin{aligned}
 &\leq \sum_{t=1}^T \mathcal{L}_t(x_t, y_t) - \sum_{t=1}^T \mathcal{L}_t(x_{t+1}, y_{t+1}) + \sum_{t=1}^T \frac{1}{\eta} R_Y(y_t) + \frac{T}{\eta} R_X(x_{T+1}) + G_{\mathcal{L}} \sum_{t=1}^T \|y_t - y_{t+1}\| \quad \text{by Lemma 3} \\
 &\leq \sum_{t=1}^T G_{\mathcal{L}} (\|x_t - x_{t+1}\| + \|y_t - y_{t+1}\|) + \sum_{t=1}^T \frac{1}{\eta} R_Y(y_t) + \frac{T}{\eta} R_X(x_{T+1}) + G_{\mathcal{L}} \sum_{t=1}^T \|y_t - y_{t+1}\| \\
 &\leq \sum_{t=1}^T G_{\mathcal{L}} (\|x_t - x_{t+1}\| + \|y_t - y_{t+1}\|) + \sum_{t=1}^T \frac{1}{\eta} R_Y(y_t) + \frac{T}{\eta} R_X(x_{T+1}) + G_{\mathcal{L}} \sum_{t=1}^T \|y_t - y_{t+1}\| \\
 &\leq 2 \sum_{t=1}^T G_{\mathcal{L}} (\|x_t - x_{t+1}\| + \|y_t - y_{t+1}\|) + \sum_{t=1}^T \frac{1}{\eta} R_Y(y_t) + \frac{T}{\eta} R_X(x_{T+1}) \\
 &\leq 2 \sum_{t=1}^T G_{\mathcal{L}} \left( \frac{4\eta}{t} [G_{\bar{\mathcal{L}}} + \frac{1}{\eta} \max(G_{R_X}, G_{R_Y})] + \sum_{t=1}^T \frac{1}{\eta} R_Y(y_t) + \frac{T}{\eta} R_X(x_{T+1}) \right) \\
 &\leq 8G_{\mathcal{L}}\eta [G_{\bar{\mathcal{L}}} + \frac{1}{\eta} \max(G_{R_X}, G_{R_Y})] (1 + \int_1^T \frac{1}{t} dt) + \sum_{t=1}^T \frac{1}{\eta} R_Y(y_t) + \frac{T}{\eta} R_X(x_{T+1}) \\
 &\leq 8G_{\mathcal{L}}\eta [G_{\bar{\mathcal{L}}} + \frac{1}{\eta} \max(G_{R_X}, G_{R_Y})] (1 + \ln(T)) + \frac{T}{\eta} \max_{y \in Y} R_Y(y) + \frac{T}{\eta} \max_{x \in X} R_X(x) \\
 &\leq 8\eta [G_{\bar{\mathcal{L}}} + \frac{1}{\eta} \max(G_{R_X}, G_{R_Y})]^2 (1 + \ln(T)) + \frac{T}{\eta} \max_{y \in Y} R_Y(y) + \frac{T}{\eta} \max_{x \in X} R_X(x).
 \end{aligned}$$

Notice that  $\min_{x \in X} \max_{y \in Y} \sum_{t=1}^T \bar{\mathcal{L}}_t(x, y) - \sum_{t=1}^T \bar{\mathcal{L}}_t(x_t, y_t)$  can be upper bounded by the same quantity using the same argument. This concludes the proof.  $\square$

*Proof of Lemma 5.* We need to find  $G_R > 0$  such that  $\|\nabla R(x)\|_{\infty} \leq G_R$  for all  $x \in \Delta_{\theta}$ . Notice that  $[\nabla R(x)]_i = 1 + \ln(x_i)$  for  $i = 1, \dots, d$ . Moreover, since for every  $i = 1, \dots, d$  we have  $\theta \leq x_i \leq 1$  the following sequence of inequalities hold:  $\ln(\theta) \leq 1 + \ln(\theta) \leq 1 + \ln(x_i) \leq 1$ . It follows that  $G_R = \max\{|\ln(\theta)|, 1\}$ .  $\square$

*Proof of Lemma 6.* Choose  $z^* = [1; 0; 0; \dots; 0; 0]$ , it is easy to see that  $z_p^* = [1 - \theta(d-1); \theta; \theta; \dots; \theta; \theta]$  and  $\|z^* - z_p^*\|_1 = 2\theta(d-1)$ .  $\square$

*Proof of Lemma 7.* Let  $(x^*, y^*)$  be any saddle point pair for  $\sum_{t=1}^T \bar{\mathcal{L}}_t(x, y)$  with  $x^* \in \Delta$ ,  $y^* \in \Delta$ . Let  $(x_{\theta}^*, y_{\theta}^*)$  be any saddle point pair for  $\sum_{t=1}^T \bar{\mathcal{L}}_t(x, y)$  with  $x_{\theta}^* \in \Delta$ ,  $y_{\theta}^* \in \Delta$ . Let  $x_p^*, y_p^*$  be the projection of  $x^*, y^*$  onto the respective simplexes using the  $\|\cdot\|_{\infty}$  norm. We first show the second inequality. Notice that

$$\begin{aligned}
 \sum_{t=1}^T \bar{\mathcal{L}}_t(x^*, y^*) &\leq \sum_{t=1}^T \bar{\mathcal{L}}_t(x_{\theta}^*, y^*) \\
 &\leq \sum_{t=1}^T \bar{\mathcal{L}}_t(x_{\theta}^*, y_p^*) + G_{\bar{\mathcal{L}}} T \|y_p^* - y^*\|_1 \\
 &\leq \sum_{t=1}^T \bar{\mathcal{L}}_t(x_{\theta}^*, y_{\theta}^*) + G_{\bar{\mathcal{L}}} T \|y_p^* - y^*\|_1.
 \end{aligned}$$

To show the first inequality in the statement of the lemma notice that

$$\begin{aligned}
 \sum_{t=1}^T \bar{\mathcal{L}}_t(x^*, y^*) &\geq \sum_{t=1}^T \bar{\mathcal{L}}_t(x^*, y_{\theta}^*) \\
 &\geq \sum_{t=1}^T \bar{\mathcal{L}}_t(x_p^*, y_{\theta}^*) - G_{\bar{\mathcal{L}}} T \|x_p^* - x^*\|_1
 \end{aligned}$$

$$\geq \sum_{t=1}^T \bar{\mathcal{L}}_t(x_\theta^*, y_\theta^*) - G_{\bar{\mathcal{L}}} T \|x_p^* - x^*\|_1.$$

This concludes the proof.  $\square$

*Proof of Theorem 3.* For convenience set  $\bar{\mathcal{L}}_t(x, y) = x^\top A_t y$ . Let  $(x^*, y^*)$  be any saddle point of  $\min_{x \in \Delta} \max_{y \in \Delta} \sum_{t=1}^T x^\top A_t y$ , let  $(x_p^*, y_p^*)$  be the respective projections onto  $\Delta_\theta$  using  $\|\cdot\|_\infty$  norm. By the choice of  $\theta$  we have that  $|\ln(\theta)| > 1$  additionally, notice that  $\max_{z \in \Delta_\theta} \sum_{i=1}^d z_i \ln(z_i) + \ln(d) \leq 0 + \ln(d)$  by Jensen's inequality.

$$\begin{aligned} & \sum_{t=1}^T x_t^\top A_t y_t - \min_{x \in \Delta} \max_{y \in \Delta} \sum_{t=1}^T x^\top A_t y \\ & \leq \sum_{t=1}^T x_t^\top A_t y_t - \min_{x \in \Delta_\theta} \max_{y \in \Delta_\theta} \sum_{t=1}^T x^\top A_t y + G_{\bar{\mathcal{L}}} T \|x^* - x_p^*\|_1 \quad \text{by Lemma 7} \\ & \leq \sum_{t=1}^T x_t^\top A_t y_t - \min_{x \in \Delta_\theta} \max_{y \in \Delta_\theta} \sum_{t=1}^T x^\top A_t y + 2G_{\bar{\mathcal{L}}} T \theta (d_1 - 1) \quad \text{by Lemma 6} \\ & \leq 8\eta [G_{\bar{\mathcal{L}}} + \frac{1}{\eta} \max(G_{R_X}, G_{R_Y})]^2 (1 + \ln(T)) + \frac{T}{\eta} \max_{y \in \Delta_\theta} R_Y(y) + \frac{T}{\eta} \max_{x \in \Delta_\theta} R_X(x) + 2G_{\bar{\mathcal{L}}} T \theta (d_1 - 1) \quad \text{by Theorem 2} \\ & \leq 8\eta [G_{\bar{\mathcal{L}}} + \frac{|\ln(\theta)|}{\eta}]^2 (1 + \ln(T)) + \frac{T}{\eta} \max_{y \in \Delta_\theta} R_Y(y) + \frac{T}{\eta} \max_{x \in \Delta_\theta} R_X(x) + 2G_{\bar{\mathcal{L}}} T \theta (d_1 - 1) \\ & \leq 32\eta G_{\bar{\mathcal{L}}}^2 (1 + \ln(T)) + \frac{T}{\eta} \max_{y \in \Delta_\theta} R_Y(y) + \frac{T}{\eta} \max_{x \in \Delta_\theta} R_X(x) + 2G_{\bar{\mathcal{L}}} T e^{-\eta G_{\bar{\mathcal{L}}}} (d_1 - 1) \quad \text{by the choice of } \theta \\ & \leq 32\eta G_{\bar{\mathcal{L}}}^2 (1 + \ln(T)) + \frac{T}{\eta} \ln(d_2) + \frac{T}{\eta} \ln(d_1) + 2G_{\bar{\mathcal{L}}} T e^{-\eta G_{\bar{\mathcal{L}}}} (d_1 - 1) \\ & \leq 32G_{\bar{\mathcal{L}}} \sqrt{T} (1 + \ln(T)) + \sqrt{T} (\ln d_1 + \ln d_2) + 2d_1 G_{\bar{\mathcal{L}}} T e^{-\sqrt{T}} \\ & = O\left(\ln(T) \sqrt{T} + \sqrt{T} \max\{\ln d_1, \ln d_2\}\right) + o(1) \max\{d_1, d_2\}. \end{aligned}$$

The last line follows because  $G_{\bar{\mathcal{L}}} \leq 1$ , since each entry of  $A$  is bounded between  $[-1, 1]$ . A symmetrical argument yields the other side of the inequality.  $\square$

*Proof of Lemma 9.*

$$\begin{aligned} & \mathbb{E}\left[\sum_{t=1}^T x_t^\top \hat{A}_t y_t\right] \\ & = \mathbb{E}\left[\sum_{t=1}^{T-1} x_t^\top \hat{A}_t y_t\right] + \mathbb{E}[x_T^\top \hat{A}_T y_T] \\ & = \mathbb{E}\left[\sum_{t=1}^{T-1} x_t^\top \hat{A}_t y_t\right] + \mathbb{E}[\mathbb{E}[x_T^\top \hat{A}_T y_T | \tau = 1, \dots, T-1]] \\ & = \mathbb{E}\left[\sum_{t=1}^{T-1} x_t^\top \hat{A}_t y_t\right] + \mathbb{E}[x_T^\top \mathbb{E}[\hat{A}_T | \tau = 1, \dots, T-1] y_T] \\ & = \mathbb{E}\left[\sum_{t=1}^{T-1} x_t^\top \hat{A}_t y_t\right] + \mathbb{E}[x_T^\top A_T y_T] \quad \text{by Theorem 4.} \end{aligned}$$

Repeating the argument  $T - 1$  more times yields the result.  $\square$

*Proof of Lemma 10.* Let us first bound  $|\sum_{t=1}^T x^\top A_t y - \sum_{t=1}^T x^\top \hat{A}_t y|$  for any  $x \in \Delta_X$  and  $y \in \Delta_Y$  with probability 1.

$$\begin{aligned} & \left| \sum_{t=1}^T x^\top A_t y - \sum_{t=1}^T x^\top \hat{A}_t y \right| \\ &= |x^\top (\sum_{t=1}^T A_t y - \sum_{t=1}^T \hat{A}_t y)| \\ &\leq \|x\|_2 \left\| \sum_{t=1}^T A_t y - \hat{A}_t y \right\|_2 \\ &\leq \left\| \sum_{t=1}^T A_t y - \hat{A}_t y \right\|_2 \end{aligned}$$

It now follows that

$$\begin{aligned} & \sum_{t=1}^T x^\top \hat{A}_t y \leq \sum_{t=1}^T x^\top A_t y + \left\| \sum_{t=1}^T A_t y - \hat{A}_t y \right\|_2 \\ \implies & \min_{x \in \Delta_{X,\delta}} \sum_{t=1}^T x^\top \hat{A}_t y \leq \sum_{t=1}^T x^\top A_t y + \left\| \sum_{t=1}^T A_t y - \hat{A}_t y \right\|_2 \quad \forall x \in \Delta_{X,\delta}, y \in \Delta_{Y,\delta} \\ \implies & \min_{x \in \Delta_{X,\delta}} \sum_{t=1}^T x^\top \hat{A}_t y \leq \max_{y \in \Delta_{Y,\delta}} \sum_{t=1}^T x^\top A_t y + \left\| \sum_{t=1}^T A_t y - \hat{A}_t y \right\|_2 \quad \forall x \in \Delta_{X,\delta}, y \in \Delta_{Y,\delta} \\ \implies & \max_{y \in \Delta_{Y,\delta}} \min_{x \in \Delta_{X,\delta}} \sum_{t=1}^T x^\top \hat{A}_t y \leq \min_{x \in \Delta_{X,\delta}} \max_{y \in \Delta_{Y,\delta}} \sum_{t=1}^T x^\top A_t y + \left\| \sum_{t=1}^T A_t y - \hat{A}_t y \right\|_2 \quad \forall x \in \Delta_{X,\delta}, y \in \Delta_{Y,\delta}. \end{aligned}$$

This concludes the proof as  $\max_{y \in \Delta_{Y,\delta}} \min_{x \in \Delta_{X,\delta}} \sum_{t=1}^T x^\top \hat{A}_t y = \min_{x \in \Delta_{X,\delta}} \max_{y \in \Delta_{Y,\delta}} \sum_{t=1}^T x^\top \hat{A}_t y$  (since the function is convex-concave and the sets  $\Delta_{Y,\delta}^\delta$  and  $\Delta_{X,\delta}^\delta$  are convex and compact), the other side of the inequality can be obtained using the other inequality follows from applying the same reasoning.  $\square$

*Proof of Lemma 11.* For any  $y$  define  $\alpha_t \triangleq A_t y - \hat{A}_t y$ . We first show that for all  $t, t'$  such that  $t < t'$  it holds that  $\mathbb{E}[\alpha_t^\top \alpha_{t'}] = 0$ . Indeed

$$\begin{aligned} \mathbb{E}[\alpha_t^\top \alpha_{t'}] &= \mathbb{E}[(A_t y - \hat{A}_t y)^\top (A_{t'} y - \hat{A}_{t'} y)] \\ &= \mathbb{E}[(A_t y)^\top A_{t'} y - (A_t y)^\top \hat{A}_{t'} y - (\hat{A}_t y)^\top A_{t'} y + (\hat{A}_t y)^\top \hat{A}_{t'} y] \\ &= (A_t y)^\top A_{t'} y - (A_t y)^\top \hat{A}_{t'} y - (\hat{A}_t y)^\top A_{t'} y + \mathbb{E}[(\hat{A}_t y)^\top \hat{A}_{t'} y] \\ &= (A_t y)^\top A_{t'} y - (A_t y)^\top \hat{A}_{t'} y - (\hat{A}_t y)^\top A_{t'} y + (\hat{A}_t y)^\top \hat{A}_{t'} y \\ &= 0, \end{aligned}$$

where the second to last line follows since

$$\begin{aligned} \mathbb{E}[(\hat{A}_t y)^\top \hat{A}_{t'} y] &= \mathbb{E}_{1, \dots, t'-1}[\mathbb{E}[(\hat{A}_t y)^\top \hat{A}_{t'} y | \tau = 1, \dots, t'-1]] \\ &= \mathbb{E}_{1, \dots, t'-1}[(\hat{A}_t y)^\top \mathbb{E}[\hat{A}_{t'} y | \tau = 1, \dots, t'-1]] \\ &= \mathbb{E}_{1, \dots, t'-1}[(\hat{A}_t y)^\top A_{t'} y] \\ &= (A_t y)^\top A_{t'} y. \end{aligned}$$

Now,

$$\mathbb{E}[\left\| \sum_{t=1}^T A_t y - \hat{A}_t y \right\|_2] = \sqrt{\mathbb{E}[\left\| \sum_{t=1}^T \alpha_t \right\|_2^2]}$$

$$\begin{aligned}
 &\leq \sqrt{\mathbb{E}[\|\sum_{t=1}^T \alpha_t\|_2^2]} \quad \text{by Jensen's Inequality} \\
 &= \sqrt{\sum_{t=1}^T \mathbb{E}[\|\alpha_t\|_2^2] + 2 \sum_{t < t'} \mathbb{E}[\alpha_t^\top \alpha_{t'}]} \\
 &= \sqrt{\sum_{t=1}^T \mathbb{E}[\|A_t y - \hat{A}_t y\|_2^2]} \\
 &\leq \sqrt{\sum_{t=1}^T \mathbb{E}[2\|A_t y\|^2 + 2\|\hat{A}_t y\|_2^2]}
 \end{aligned}$$

We proceed to bound  $\|\hat{A}_t y\|_2$ , the upper bound we obtain will also bound  $\|A_t y\|$  because of the following fact. If the random vector  $\tilde{a}$  satisfies  $\|\tilde{a}\| \leq c$  for some constant  $c$  with probability 1 then  $\|\mathbb{E}\tilde{a}\| \leq c$ . Indeed by Jensen's inequality we have that  $\|\mathbb{E}\tilde{a}\| \leq \mathbb{E}\|\tilde{a}\| \leq c$ . Let us omit the subscript  $t$  for the rest of the proof. Let  $\hat{A}_{[i,\cdot]}$  be the  $i$ -th row of matrix  $\hat{A}$ .

$$\begin{aligned}
 \|\hat{A}y\|_2 &= \sqrt{\sum_{i=1}^{d_1} \left[ \sum_{j=1}^{d_2} \hat{a}_{i,j} y_j \right]^2} \\
 &\leq \sum_{i=1}^{d_1} \sqrt{\sum_{j=1}^{d_2} \hat{a}_{i,j} y_j} \\
 &= \sum_{i=1}^{d_1} \left| \sum_{j=1}^{d_2} \hat{a}_{i,j} y_j \right| \\
 &\leq \sum_{i=1}^{d_1} \|\hat{A}_{[i,\cdot]}\|_\infty \|y\|_1 \quad \text{by generalized Cauchy Schwartz} \\
 &\leq d_1 \max_{i,j} \left| \frac{A_{i,j}}{\delta^2} \right| \quad \text{by definition of } \hat{A} \text{ and using the fact that } x_t \in \Delta_{X,\delta} \text{ and } y_t \in \Delta_{Y,\delta} \\
 &\leq \frac{d_1}{\delta^2}.
 \end{aligned}$$

Notice the upper bound  $\frac{d_2}{\delta^2}$  can also be obtained by interchanging the summations and repeating the argument. This yields the desired result.  $\square$

*Proof of Theorem 5.* We first focus on one side of the inequality,

$$\begin{aligned}
 &\mathbb{E}\left[\sum_{t=1}^T e_{x,t}^\top A_t e_{y,t} - \min_{x \in X} \max_{y \in Y} \sum_{t=1}^T x^\top A_t y\right] \\
 &= \mathbb{E}\left[\sum_{t=1}^T e_{x,t}^\top A_t e_{y,t}\right] - \mathbb{E}\left[\min_{x \in X} \max_{y \in Y} \sum_{t=1}^T x^\top A_t y\right] \\
 &= \mathbb{E}\left[\sum_{t=1}^T x_t^\top A_t y_t\right] - \mathbb{E}\left[\min_{x \in X} \max_{y \in Y} \sum_{t=1}^T x^\top A_t y\right] \quad \text{by Lemma 8} \\
 &= \mathbb{E}\left[\sum_{t=1}^T x_t^\top A_t y_t\right] - \mathbb{E}\left[\min_{x \in \Delta_X^\delta} \max_{y \in \Delta_Y^\delta} \sum_{t=1}^T x^\top A_t y\right] + 2\delta G_{\mathcal{L}}^{\|\cdot\|_1} (d_1 - 1)T \quad \text{by Lemmas 6 and 7} \\
 &\leq \mathbb{E}\left[\sum_{t=1}^T x_t^\top A_t y_t\right] - \mathbb{E}\left[\min_{x \in \Delta_X^\delta} \max_{y \in \Delta_Y^\delta} \sum_{t=1}^T x^\top \hat{A}_t y\right] + \frac{2\sqrt{T} \min(d_1, d_2)}{\delta^2} + 2\delta G_{\mathcal{L}}^{\|\cdot\|_1} (d_1 - 1)T \quad \text{by Lemmas 10 and 11}
 \end{aligned}$$



$$\begin{aligned}
 &\leq \mathbb{E}\left[\sum_{t=1}^T x_t^\top \hat{A}_t y_t\right] - \mathbb{E}\left[\min_{x \in \Delta_X^\delta} \max_{y \in \Delta_Y^\delta} \sum_{t=1}^T x^\top \hat{A}_t y\right] + \frac{2\sqrt{T} \min(d_1, d_2)}{\delta^2} + 2\delta G_{\hat{\mathcal{L}}}^{\|\cdot\|_1} (d_1 - 1)T \quad \text{by Lemma 9} \\
 &\leq 8\eta \left[G_{\hat{\mathcal{L}}}^{\|\cdot\|_1} + \frac{|\ln(\delta)|}{\eta}\right]^2 (1 + \ln(T)) + \frac{T}{\eta} (\ln(d_1) + \ln(d_2)) \\
 &\quad + \frac{2\sqrt{T} \min(d_1, d_2)}{\delta^2} + 2\delta G_{\hat{\mathcal{L}}}^{\|\cdot\|_1} (d_1 - 1)T \quad \text{as in the proof of Theorem 3} \\
 &= 8\eta \left[\frac{1}{\delta^2} + \frac{|\ln(\delta)|}{\eta}\right]^2 (1 + \ln(T)) + \frac{T}{\eta} (\ln(d_1) + \ln(d_2)) + \frac{2\sqrt{T} \min(d_1, d_2)}{\delta^2} + 2\delta (d_1 - 1)T \quad \text{by Lemma 1} \\
 &= O((d_1 + d_2) \ln(T) T^{5/6}) \quad \text{after plugging in } \delta = \frac{1}{T^{1/6}}, \eta = T^{1/6}
 \end{aligned}$$

The other side of the inequality follows by a symmetrical argument. □
